# Supplementary material for: Ultraviolet photochemistry of the 2-buten-2-yl radical
Source: Royal Society of Chemistry journal article supplement (doi:10.1039/d4cp03076a), 2024-01-01
Supplement: d4cp03076a1.pdf [file d4cp03076a1.pdf]

**Supplementary information:**

**Ultraviolet photochemistry dynamics of the 2-buten-2-yl radical**

Michael Lucas,<sup>a#</sup> Yuan Qin,<sup>#</sup> Lei Yang, Ge Sun, and Jingsong Zhang\*

*Department of Chemistry*

*University of California at Riverside*

*Riverside, CA 92521*

*U. S. A.*

a. Present address: Department of Chemistry, University of Hawaii at Manoa, Honolulu, HI 96822, USA.

\* Corresponding author. E-mail: [jingsong.zhang@ucr.edu](mailto:jingsong.zhang@ucr.edu). Fax: 1-951-827-4713. Also at the Air Pollution Research Center, University of California, Riverside, CA 92521, USA.

## 1. Background removal in the H-atom TOF spectrum of 2-buten-2-yl

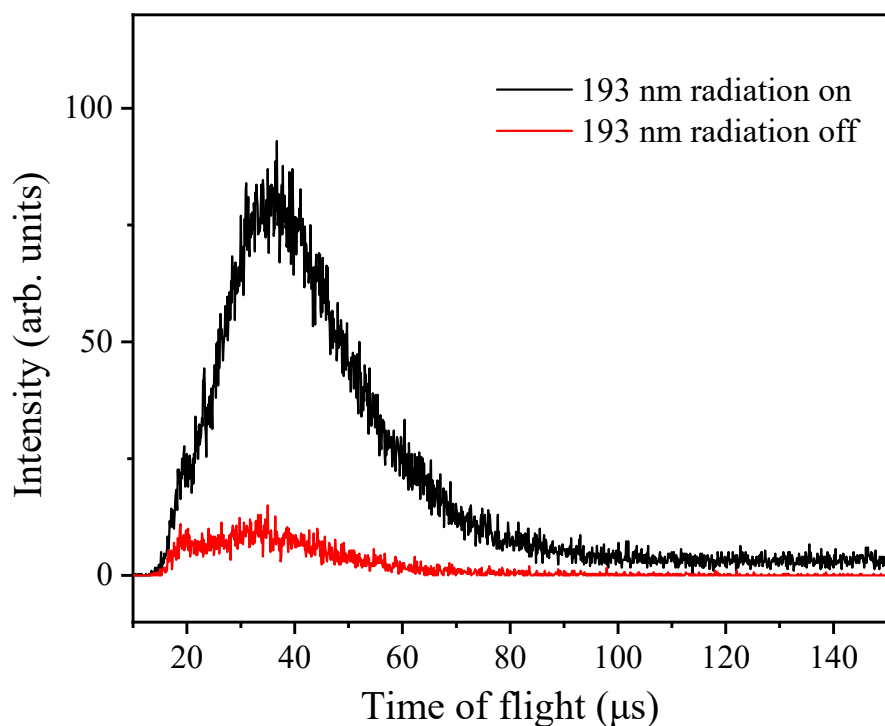

**Fig. S1** Sample H-atom TOF spectra of 236-nm photodissociation of 2-buten-2-yl from 2-chloro-2-butene, with the 193-nm photolysis laser radiation on and off. The polarization vector of the 236 nm photodissociation radiation was parallel ( $\theta = 0^\circ$ ) to the TOF axis. The red line recorded with the 193-nm photolysis laser off, represents background signals resulting from 236-nm photodissociation of the 2-chloro-2-butene precursor. By subtracting this 193-nm off spectrum from the 193-nm on spectrum, the net H-atom TOF spectrum originating from the 236-nm photodissociation of 2-buten-2-yl is obtained (as shown in Fig. 3, after accumulating over a larger number of laser shots).

## 2. Structure and excited electronic states of *trans*-2-buten-2-yl

**Table S1.** Cartesian coordinates (in Å) for the ground state structure of *trans*-2-buten-2-yl optimized using CCSD/aug-cc-pVDZ. Electronic energy is  $-156.088535$  Hartree.

|   |             |             |             |
|---|-------------|-------------|-------------|
| C | 2.02521800  | -0.03823300 | -0.00000200 |
| H | 2.50981900  | -0.46848300 | -0.89296100 |
| H | 2.50980700  | -0.46861800 | 0.89289900  |
| H | 2.20692500  | 1.05614400  | 0.00008200  |
| C | 0.55864700  | -0.30982600 | -0.00003900 |
| C | -0.56771700 | 0.40146400  | -0.00000100 |
| H | -0.47883100 | 1.50418300  | 0.00011000  |
| C | -1.97235200 | -0.16869300 | 0.00001300  |
| H | -2.53166400 | 0.16934600  | 0.89066600  |
| H | -2.53173200 | 0.16950300  | -0.89053700 |
| H | -1.94709900 | -1.27034600 | -0.00008400 |

**Table S2.** Cartesian coordinates (in Å) for the D<sub>5</sub> excited state structure of *trans*-2-buten-2-yl optimized using EOM-CCSD/daug-cc-pVDZ. Electronic energy is  $-155.901421$  Hartree.

|   |             |             |             |
|---|-------------|-------------|-------------|
| C | 2.01537300  | -0.10277200 | -0.00001900 |
| H | 2.35990600  | -0.59186300 | -0.92408600 |
| H | 2.35997600  | -0.59193900 | 0.92398100  |
| H | 2.46254400  | 0.93625600  | 0.00000700  |
| C | 0.60456200  | 0.16361100  | 0.00005800  |
| C | -0.62513500 | 0.53615500  | 0.00013500  |
| H | -0.67947000 | 1.64489600  | 0.00014000  |
| C | -1.94276300 | -0.23590200 | 0.00000200  |
| H | -2.50364200 | 0.06923700  | 0.90129800  |
| H | -2.50358000 | 0.06939500  | -0.90128500 |
| H | -1.76675100 | -1.32063400 | -0.00008600 |

**Table S3.** Cartesian coordinates (in Å) for the D<sub>6</sub> excited state structure of *trans*-2-buten-2-yl optimized using EOM-CCSD/daug-cc-pVDZ. Electronic energy is  $-155.8978684$  Hartree.

|   |             |             |             |
|---|-------------|-------------|-------------|
| C | 1.99593000  | -0.11506600 | 0.00030600  |
| H | 2.30551600  | -0.64475700 | -0.91748800 |
| H | 2.30523100  | -0.64374900 | 0.91877300  |
| H | 2.53856400  | 0.87355400  | -0.00019000 |
| C | 0.60031300  | 0.23613300  | -0.00010700 |
| C | -0.65323100 | 0.65114100  | -0.00054900 |
| H | -0.79749400 | 1.74450700  | -0.00097700 |
| C | -1.89722900 | -0.23601800 | -0.00004900 |
| H | -2.48940800 | 0.00638800  | 0.90090600  |
| H | -2.49192800 | 0.00882700  | -0.89864200 |
| H | -1.63524200 | -1.30451900 | -0.00183800 |

**Table S4.** Excited state energies of *trans*-2-buten-2-yl obtained with different electronic structure methods. Vertical excitation energies (VEE) are converted into nm and the oscillator strengths (f) are provided accordingly. The ground-state molecular geometry was optimized using CCSD/aug-cc-pVDZ optimized structure. Dominant natural transition orbital (NTO) excitations of *trans*-2-buten-2-yl obtained with CAM-B3LYP/6-31++G are listed for reference.

| Excited states                                     | NTO dominant transition | CAM-B3LYP/6-31++G     |       | CAM-B3LYP/aug-cc-pVQZ |       | CAM-B3LYP/daug-cc-pVQZ |       | EOM-CCSD/aug-cc-pVDZ |       |
|----------------------------------------------------|-------------------------|-----------------------|-------|-----------------------|-------|------------------------|-------|----------------------|-------|
|                                                    |                         | VEE (nm)              | f     | VEE (nm)              | f     | VEE (nm)               | f     | VEE (nm)             | f     |
| D <sub>1</sub>                                     | $\pi \rightarrow n$     | 411.5                 | 0.002 | 445.2                 | 0.001 | 445.2                  | 0.001 | 397.7                | 0.001 |
| D <sub>2</sub>                                     | $\pi \rightarrow \pi^*$ | 285.5                 | 0.000 | 301.2                 | 0.000 | 301.2                  | 0.000 | 264.8                | 0.000 |
| D <sub>3</sub>                                     | $n \rightarrow \pi^*$   | 259.8                 | 0.002 | 263.6                 | 0.001 | 263.7                  | 0.001 | 242.2                | 0.002 |
| D <sub>4</sub>                                     | $n \rightarrow 3s$ Ry   | 229.3                 | 0.002 | 222.7                 | 0.002 | 223.2                  | 0.002 | 217.4                | 0.002 |
| D <sub>5</sub>                                     | $n \rightarrow 3p_y$ Ry | 205.3                 | 0.080 | 202.4                 | 0.074 | 203.4                  | 0.069 | 198.2                | 0.075 |
| Adiabatic excitation energy of D <sub>5</sub> (nm) |                         | 248.4                 |       | 250.8                 |       | 252.1                  |       | 237.4                |       |
| D <sub>6</sub>                                     | $n \rightarrow 3p_x$ Ry | 204.7                 | 0.029 | 201.1                 | 0.012 | 201.8                  | 0.011 | 195.2                | 0.029 |
| Adiabatic excitation energy of D <sub>6</sub> (nm) |                         | 239.7                 |       | 244.4                 |       | 245.7                  |       | 234.5                |       |
| D <sub>7</sub>                                     | $\pi \rightarrow 3s$ Ry | 199.0                 | 0.000 |                       |       |                        |       |                      |       |
| D <sub>8</sub>                                     | $\pi \rightarrow 3s$ Ry | 195.1                 | 0.007 |                       |       |                        |       |                      |       |
| Excited states                                     | NTO dominant transition | EOM-CCSD/daug-cc-pVDZ |       | EOM-CCSD/aug-cc-pVTZ  |       | EOM-CCSD/daug-cc-pVTZ  |       |                      |       |
|                                                    |                         | VEE (nm)              | f     | VEE (nm)              | f     | VEE (nm)               | f     |                      |       |
| D <sub>1</sub>                                     | $\pi \rightarrow n$     | 397.7                 | 0.001 | 399.1                 | 0.001 | 399.0                  | 0.001 |                      |       |
| D <sub>2</sub>                                     | $\pi \rightarrow \pi^*$ | 264.9                 | 0.000 | 264.9                 | 0.000 | 264.9                  | 0.000 |                      |       |
| D <sub>3</sub>                                     | $n \rightarrow \pi^*$   | 242.4                 | 0.002 | 244.2                 | 0.002 | 244.3                  | 0.002 |                      |       |
| D <sub>4</sub>                                     | $n \rightarrow 3s$ Ry   | 218.8                 | 0.002 | 213.8                 | 0.002 | 214.3                  | 0.002 |                      |       |
| D <sub>5</sub>                                     | $n \rightarrow 3p_y$ Ry | 200.7                 | 0.067 | 195.5                 | 0.071 | 196.7                  | 0.066 |                      |       |
| Adiabatic excitation energy of D <sub>5</sub> (nm) |                         | 240.2                 |       | 236.5                 |       | 237.8                  |       |                      |       |
| D <sub>6</sub>                                     | $n \rightarrow 3p_x$ Ry | 197.1                 | 0.025 | 192.4                 | 0.026 | 193.2                  | 0.024 |                      |       |
| Adiabatic excitation energy of D <sub>6</sub> (nm) |                         | 235.8                 |       | 232.1                 |       | 233.4                  |       |                      |       |

**Table S5.** Transition dipole moments and dominant natural transition orbital (NTO) excitations of *trans*-2-buten-2-yl obtained with CAM-B3LYP/6-31++G. The definition of the Cartesian x, y, and z vectors for the directions of transition dipole moments can be found in **Fig. S2**.

| Excited states | Transition dipole moments |        |        |         | NTO                     |                          |        |
|----------------|---------------------------|--------|--------|---------|-------------------------|--------------------------|--------|
|                | X                         | Y      | Z      | Squared | Character               | Main transition(s)       | Weight |
| D <sub>1</sub> | 0                         | 0      | -0.167 | 0.028   | $\pi$ to n              | 15 $\beta$ →16 $\beta$   | 1.96   |
| D <sub>2</sub> | 0.0335                    | 0.023  | 0      | 0.002   | $\pi$ to $\pi^*$        | 16 $\alpha$ →17 $\alpha$ | 1.06   |
|                |                           |        |        |         | $\pi$ to $\pi^*$        | 15 $\beta$ →16 $\beta$   | 1.01   |
| D <sub>3</sub> | 0                         | 0      | -0.139 | 0.019   | n to $\pi^*$            | 16 $\alpha$ →17 $\alpha$ | 1.95   |
| D <sub>4</sub> | -0.117                    | -0.038 | 0      | 0.015   | n to 3s Ry              | 16 $\alpha$ →17 $\alpha$ | 1.98   |
| D <sub>5</sub> | -0.289                    | -0.676 | -0.000 | 0.540   | n to 3p <sub>y</sub> Ry | 16 $\alpha$ →17 $\alpha$ | 1.99   |
| D <sub>6</sub> | 0.229                     | -0.378 | -0.000 | 0.195   | n to 3p <sub>x</sub> Ry | 16 $\alpha$ →17 $\alpha$ | 1.98   |
| D <sub>7</sub> | 0                         | 0      | 0.047  | 0.0022  | $\pi$ to 3s Ry          | 15 $\beta$ →16 $\beta$   | 1.85   |
| D <sub>8</sub> | 0                         | 0      | 0.211  | 0.0445  | $\pi$ to 3s Ry          | 16 $\alpha$ →17 $\alpha$ | 1.43   |
|                |                           |        |        |         | n to 3p <sub>z</sub> Ry | 15 $\alpha$ →18 $\alpha$ | 0.45   |

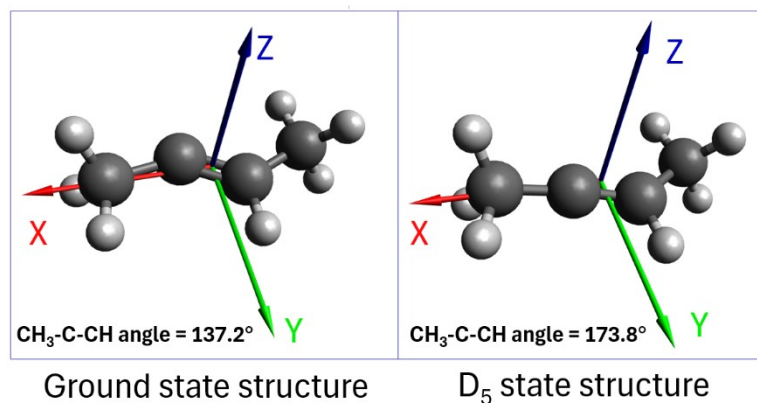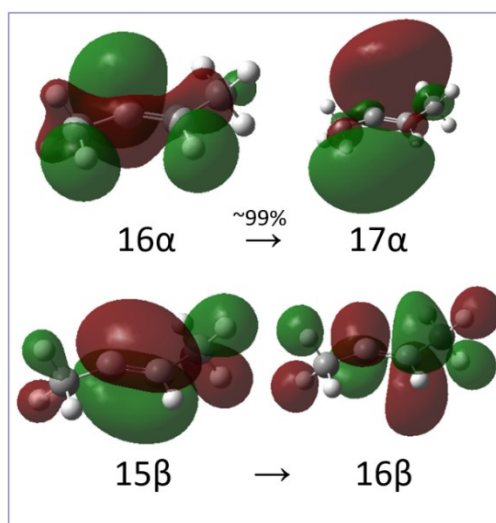

**Fig. S2** The natural transition orbitals (NTOs) for transitions from the ground state D<sub>0</sub> to the excited state D<sub>5</sub> of *trans*-2-buten-2-yl (CAM-B3LYP/6-31++G). The directions of the Cartesian vectors with respect to the structures of the ground state D<sub>0</sub> and the D<sub>5</sub> state are displayed.

### 3. Rice–Ramsperger–Kassel–Marcus (RRKM) calculations of rate constants

The unimolecular rate constant calculations for 2-buten-2-yl decomposition into 2-butyne + H and 1,2-butadiene + H were computed using Rice–Ramsperger–Kassel–Marcus (RRKM)<sup>1</sup> theory under the experimental conditions. The RRKM expression for an energy dependent rate constants  $k(E)$  is given

by  $k(E) = \frac{\sigma W^\ddagger(E - E^\ddagger)}{h\rho(E)}$ , where  $\sigma$  is the reaction path degeneracy,  $h$  is Planck's constant,

$W^\ddagger(E - E^\ddagger)$  is the total number of states for the transition state, and  $\rho(E)$  represents the density of states of the energized reactants. The total number of states and the densities of states were determined using harmonic frequencies calculated at the CCSD(T)/aug-cc-PVTZ//CAM-B3LYP/6-311++G(d,p) level of theory.  $E$  was taken to be the excitation energy assuming it is transferred into the internal normal modes of 2-buten-2-yl. The rate constants were computed using the ab initio potential energy surface information in this work, at  $p = 2 \times 10^{-6}$  Torr and  $T = 298$  K, employing the MESMER package.<sup>2</sup> The calculated population of the reaction compounds over time at the 246 nm and 226 nm excitation energy are shown in Fig. S3 and S4, respectively. The rate constant for 2-buten-2-yl  $\rightarrow$  2-butyne + H is determined to be  $k = 4.5 \times 10^{11} \text{ s}^{-1}$  at 246 nm and  $7.1 \times 10^{11} \text{ s}^{-1}$  at 226 nm; while for the decomposition to 1,2-butadiene + H,  $k = 8.5 \times 10^{10} \text{ s}^{-1}$  at 246 nm and  $1.4 \times 10^{11} \text{ s}^{-1}$  at 226 nm.

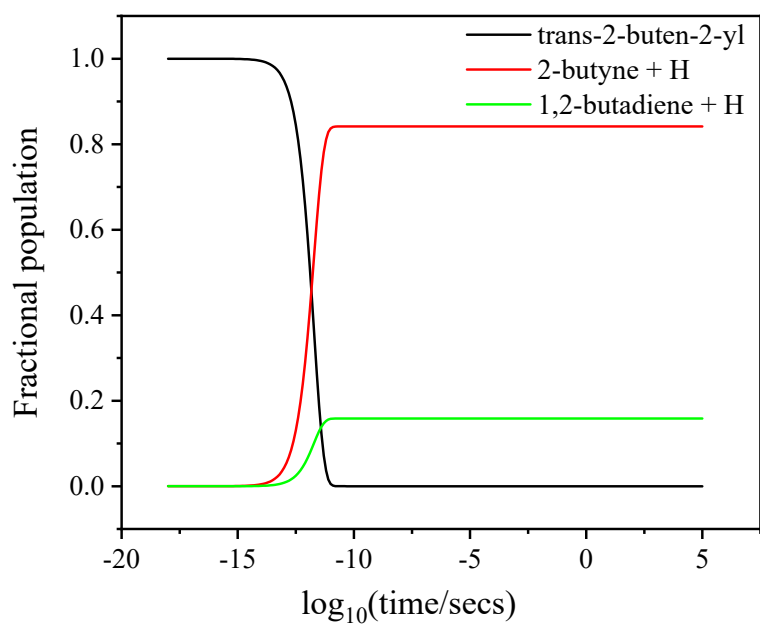

**Fig. S3.** The relative population for 2-buten-2-yl with an internal energy of 116.2 kcal/mol (246 nm), decomposes over time into 2-butyne + H and 1,2-butadiene + H at 298 K.

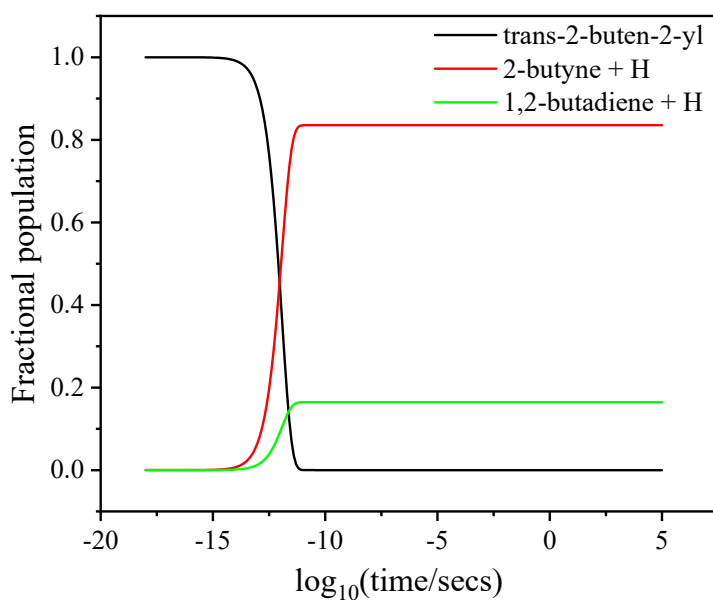

**Fig. S4.** The relative population for 2-buten-2-yl with an internal energy of 126.5 kcal/mol (226 nm), decomposes over time into 2-butyne + H and 1,2-butadiene + H at 298 K.



## References:

1. H. Eyring, S. H. Lin and S. M. Lin, *Basic Chemical Kinetics*, John Wiley & Sons, New York, 1980.
2. D. R. Glowacki, C.-H. Liang, C. Morley, M. J. Pilling and S. H. Robertson, *J. Phys. Chem. A*, 2012, **116**, 9545-9560.
